# Supplementary material for: CeO2−x nanorods with intrinsic urease-like activity
Source: Royal Society of Chemistry journal article supplement (doi:10.1039/c8nr03556c), 2018-01-01
Supplement: c8nr03556c1.pdf [file c8nr03556c1.pdf]

## CeO<sub>2-x</sub> Nanorods with Intrinsic Urease-Like Activity

**K. Korschelt,<sup>a</sup> R. Schwidetzky,<sup>a</sup> F. Pfitzner,<sup>a</sup> J. Strugatchi,<sup>a</sup> C. Schilling,<sup>b</sup> M. von der Au,<sup>c</sup> K. Kirchhoff,<sup>d</sup> M. Panthöfer,<sup>a</sup> I. Lieberwirth,<sup>d</sup> M. N. Tahir,<sup>e</sup> C. Hess,<sup>b</sup> B. Meermann,<sup>c</sup> W. Tremel<sup>a\*</sup>**

<sup>a</sup> Institut für Anorganische Chemie und Analytische Chemie, Johannes Gutenberg-Universität, Duesbergweg 10-14, D-55128 Mainz, Germany. Homepage: <http://www.ak-tremel.chemie.uni-mainz.de/>

<sup>b</sup> Eduard-Zintl-Institut Institut für Physikalische Chemie, Technische Universität Darmstadt, Alarich-Weiss-Str. 8 D-64287 Darmstadt, Germany

<sup>c</sup> Federal Institute of Hydrology, Departement G2 Aquatic Chemistry, Am Mainzer Tor 1, D-56068 Koblenz, Germany

<sup>d</sup> Max Planck Institute for Polymer Research, Ackermannweg 10, D-55128 Mainz, Germany

<sup>e</sup> King Fahd University of Petroleum and Minerals, Kingdom of Saudi Arabia.

\* *Corresponding Author:* [tremel@uni-mainz.de](mailto:tremel@uni-mainz.de)

## Figures

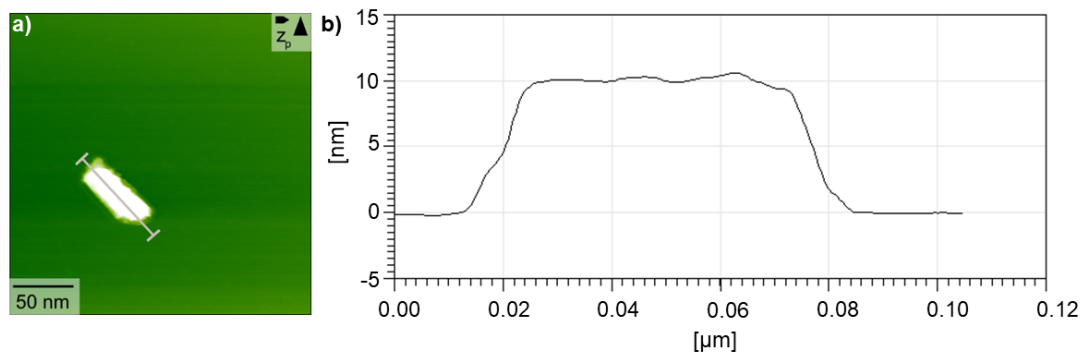

Fig. S1. AFM image of  $\text{CeO}_{2-x}$  NRs showing a height of approx. 9-11 nm.

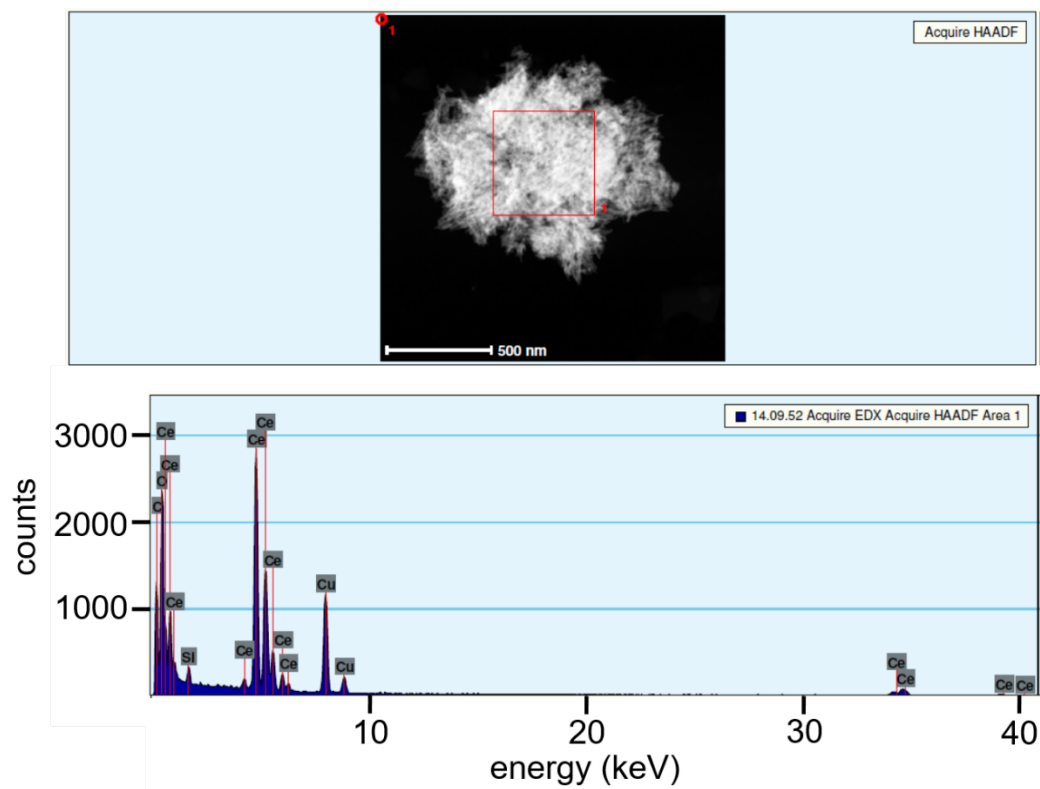

Fig. S2. EDX spectrum of  $\text{CeO}_{2-x}$  NRs.

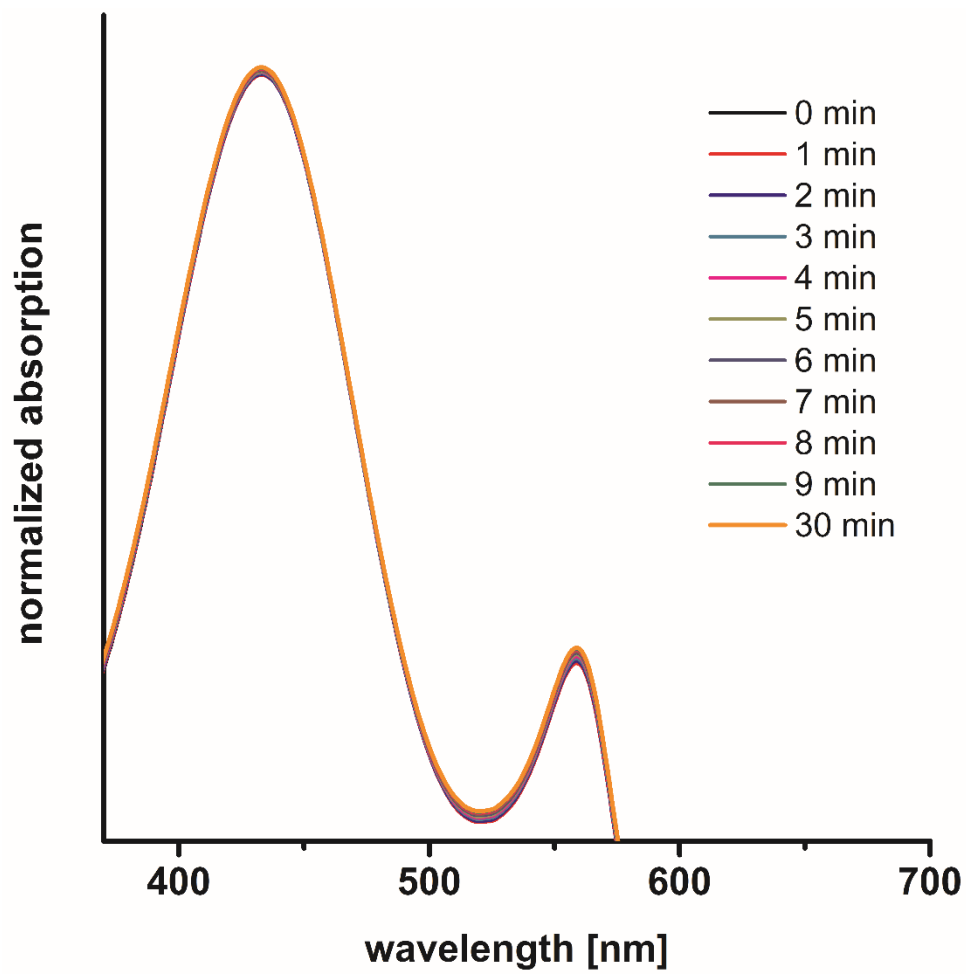

**Fig. S3. Kinetic absorption scan of a phosphate buffered solution** containing phenol red and urea without enzyme mimic show no significant change of absorptions at 434 nm and 560 nm.

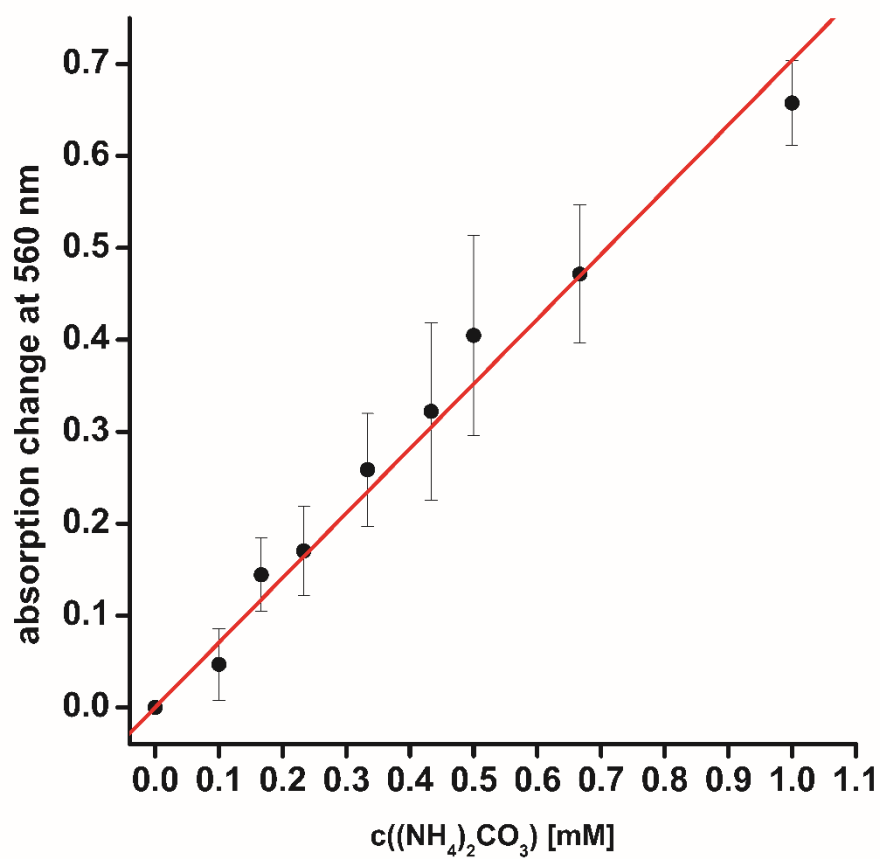

**Fig. S4.** Calibration conducted with 0.1 M ammonium carbonate  $((\text{NH}_4)_2\text{CO}_3)$  solution enables the combination of formed or added amount of ammonium carbonate and the resulting absorption change at 560 nm. Calibrations were done prior to each measurement.

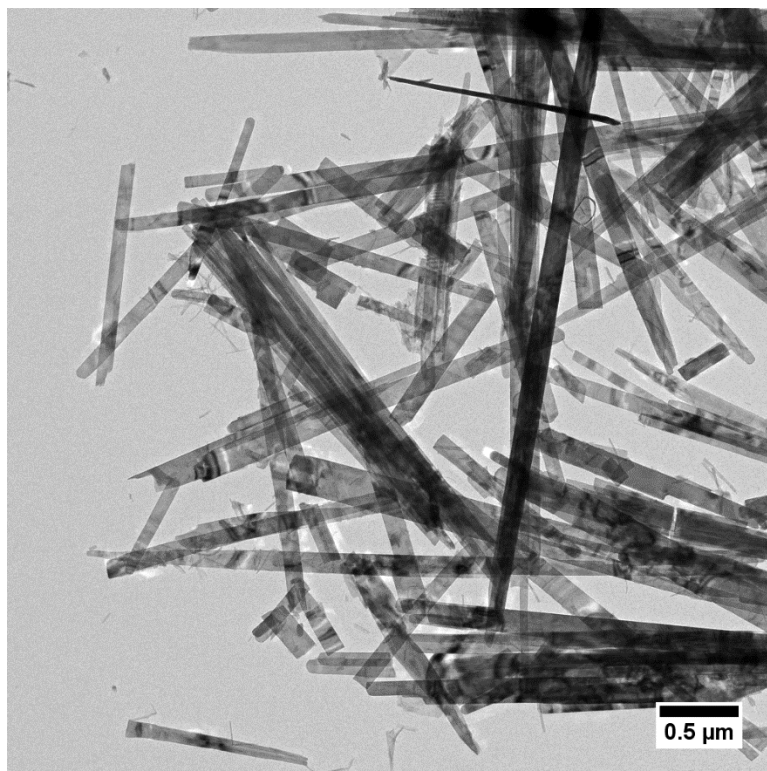

**Fig. S5.** Representative TEM image of MoO<sub>3-x</sub> nanobelts.

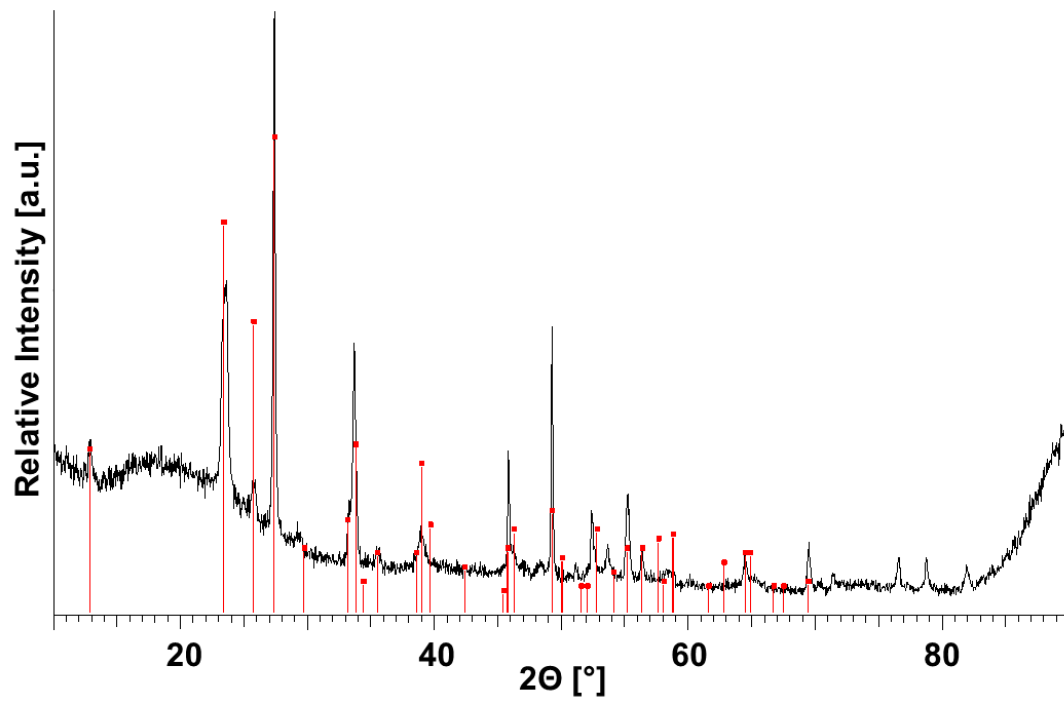

Fig. S6. Powder diffractogram of  $\text{MoO}_{3-x}$  nanobelts and calculated reflection positions of  $\text{MoO}_3$  (red).

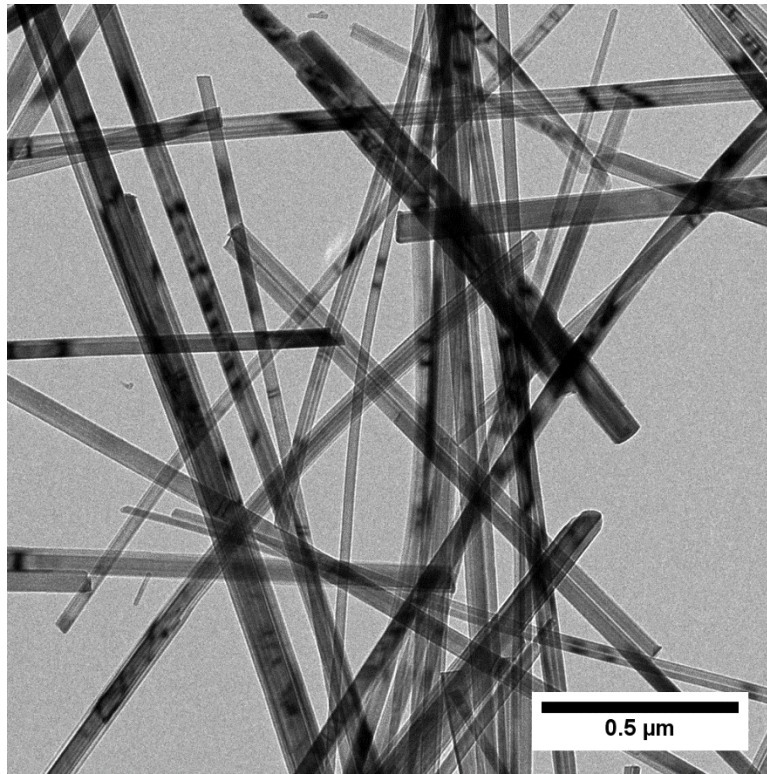

**Fig. S7.** Representative TEM image of V<sub>2</sub>O<sub>5</sub> nanowires.



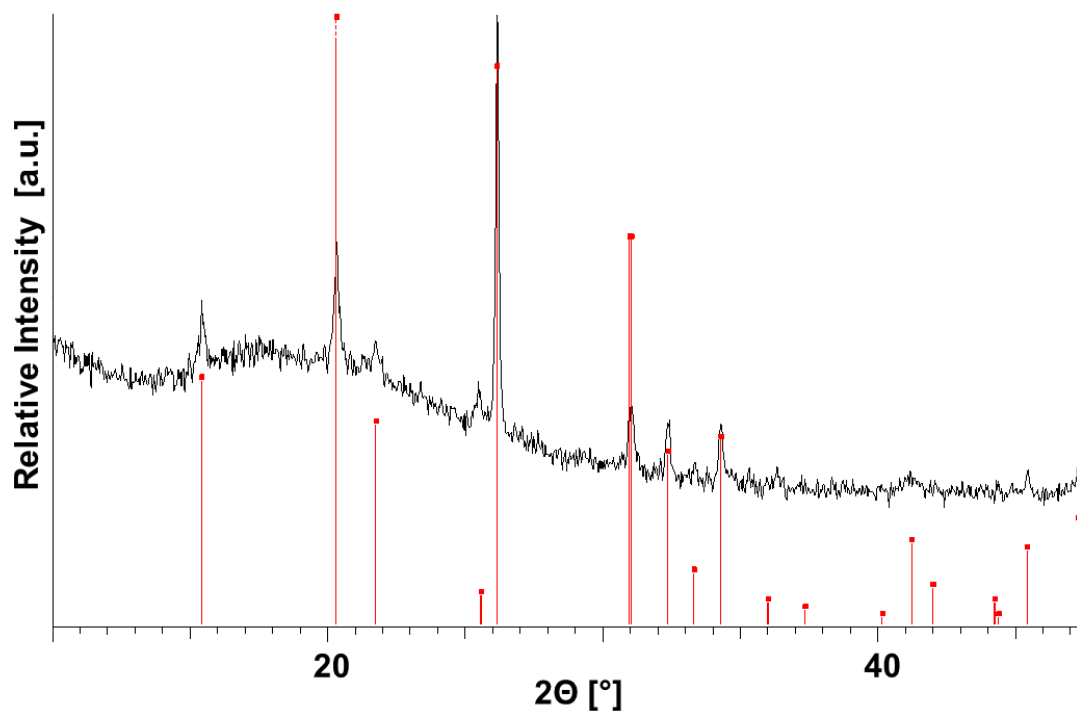

Fig. S8. Powder diffractogram of V<sub>2</sub>O<sub>5</sub> nanowires.

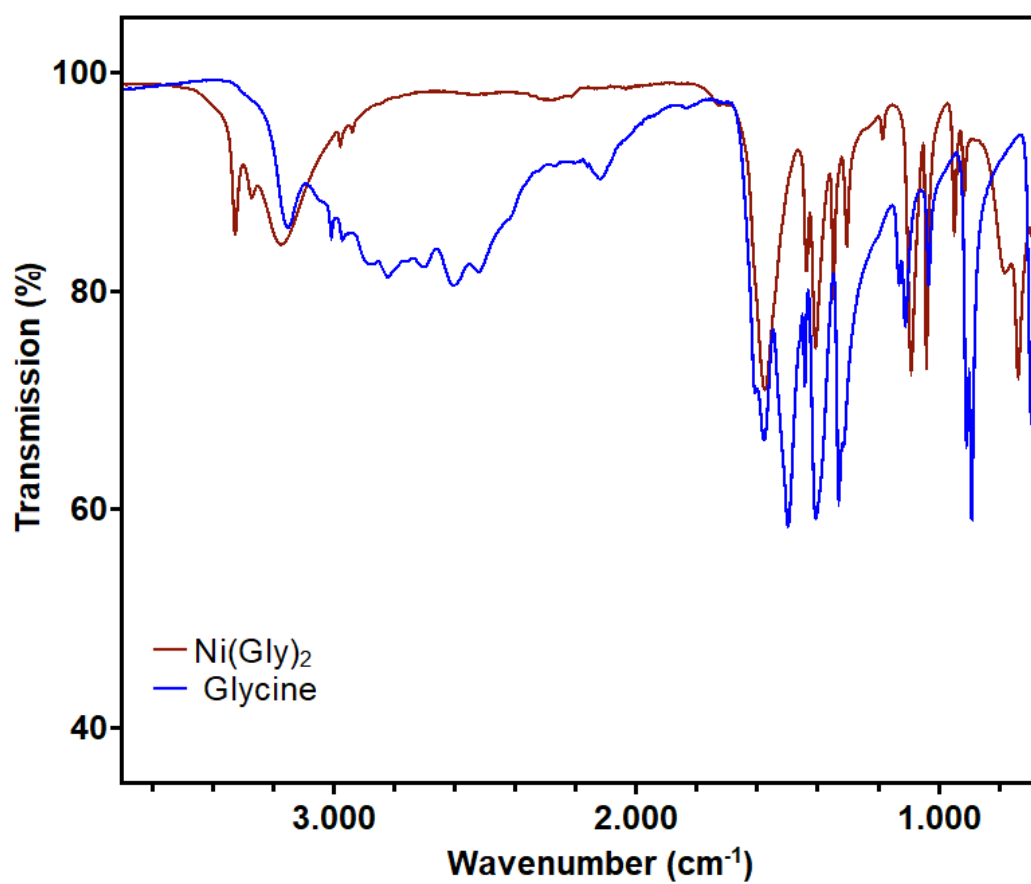

Fig. S9. IR spectra of the Ni(Gly)<sub>2</sub> complex and glycine.

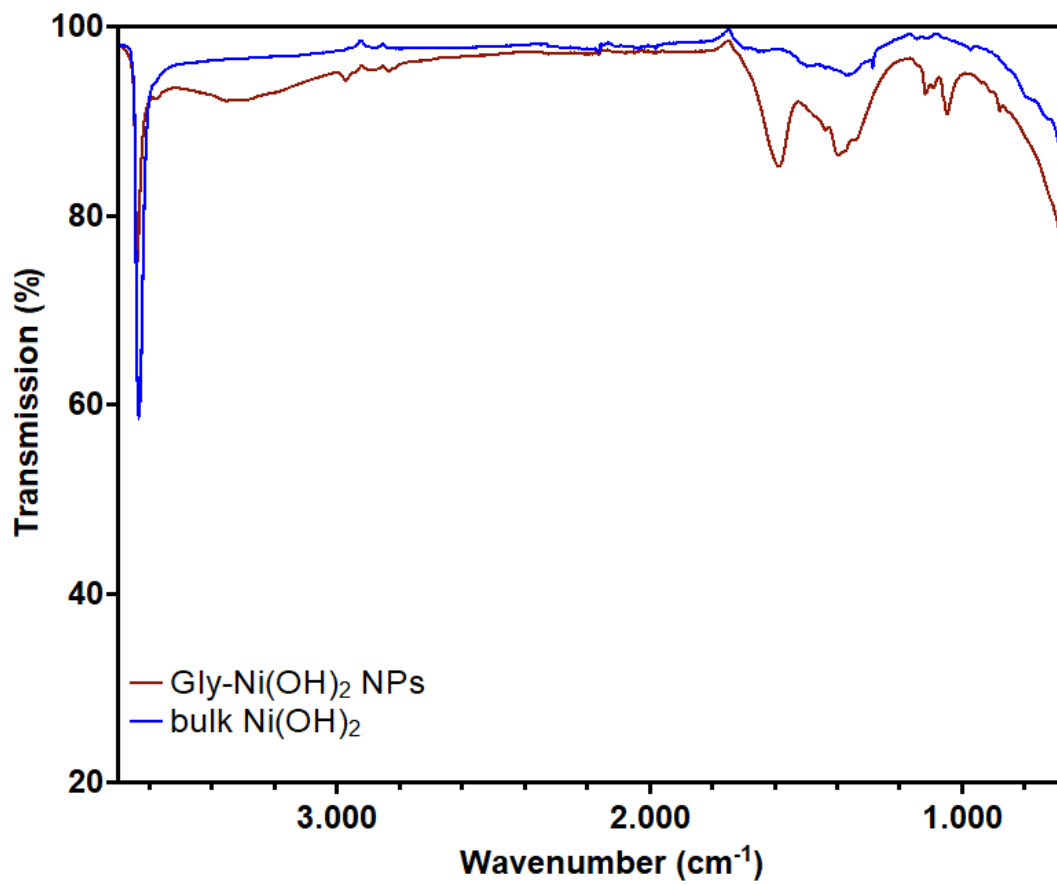

Fig. S10. IR spectra of Gly-Ni(OH)<sub>2</sub> NPs and bulk Ni(OH)<sub>2</sub>.

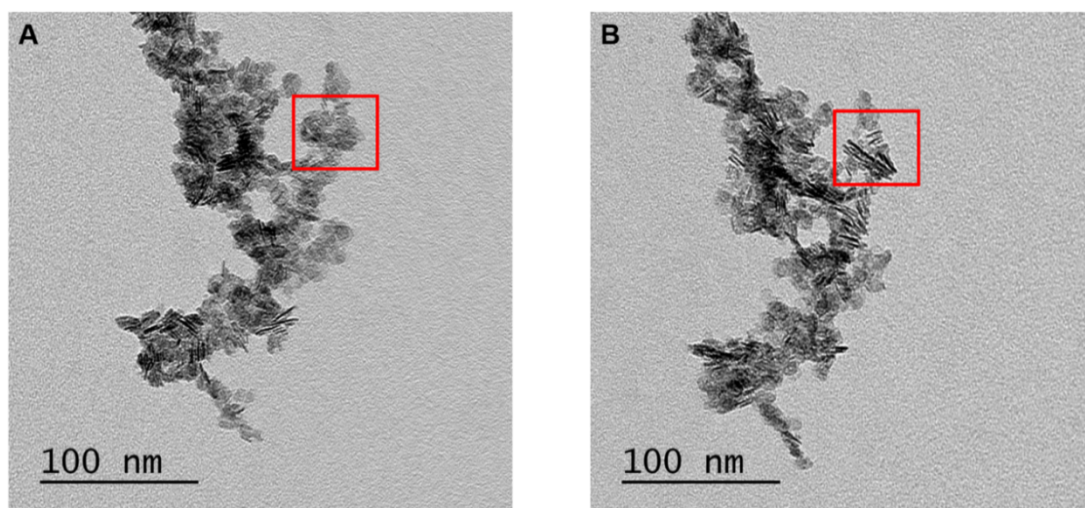

**Fig. S11. TEM images of Gly-Ni(OH)<sub>2</sub> NPs.** TEM images show the formation of Ni(OH)<sub>2</sub> nanosheets with a diameter of approx.  $(10.62 \pm 1.29)$  nm. The TEM images were tilted  $-40^\circ$  (A) and  $+40^\circ$  (B) to demonstrate the sheet structure.

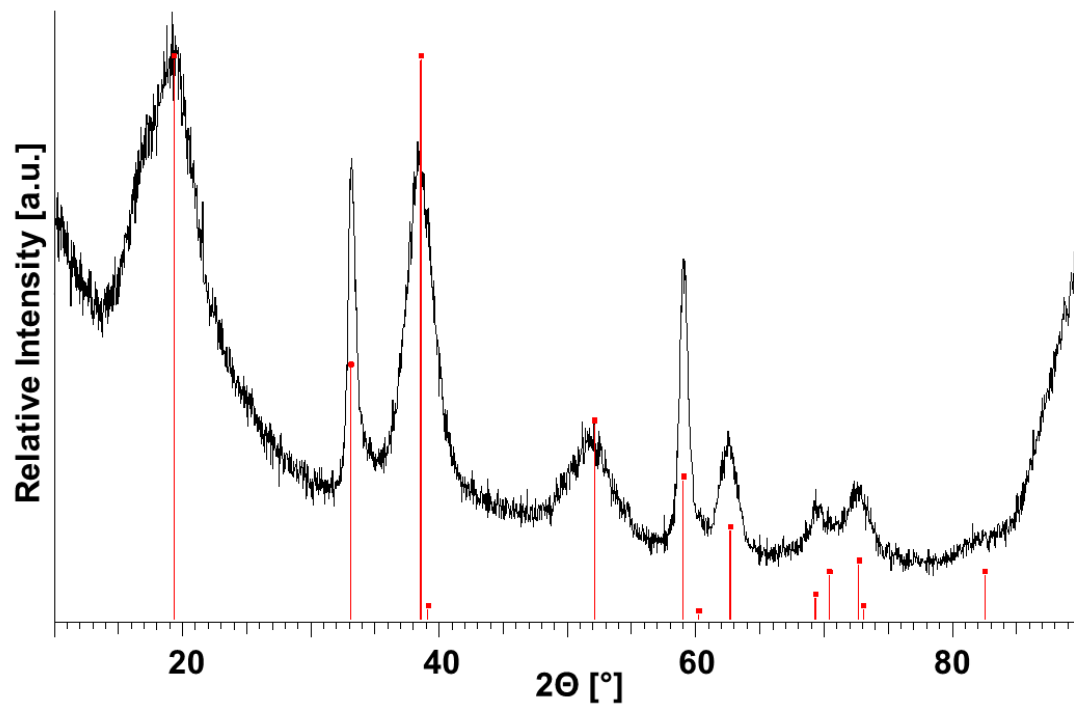

**Fig. S12. P-XRD measurement of Gly-Ni(OH)<sub>2</sub> NPs.** Measured pattern (black) and reflection positions of theoprasite (red). The sheet structure seen in the TEM images of Gly-Ni(OH)<sub>2</sub> NPs is demonstrated by the broadened reflections (flat plane), and sharp reflections (thickness of the as-synthesized NPs).

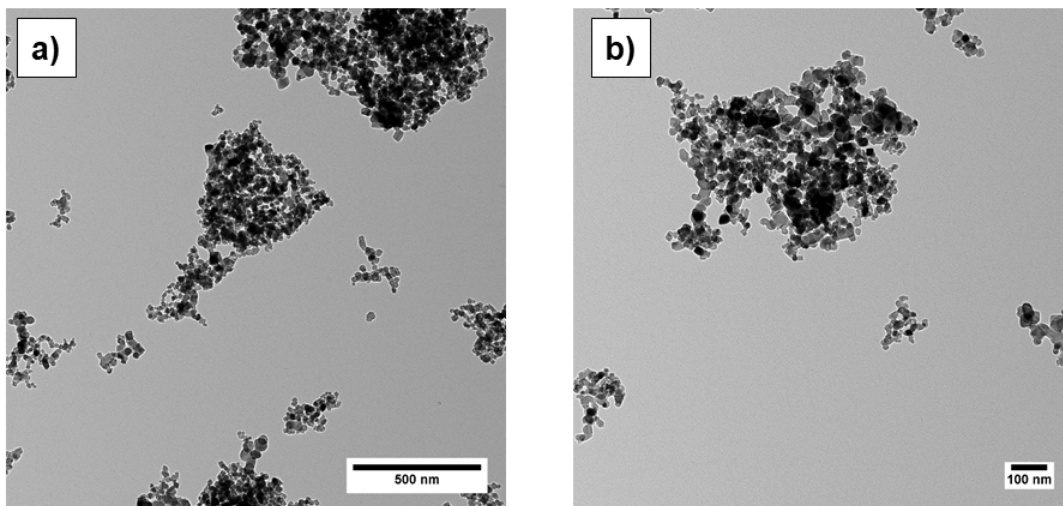

**Fig. S13.** TEM images of commercially available TiO<sub>2</sub> nanoparticles.

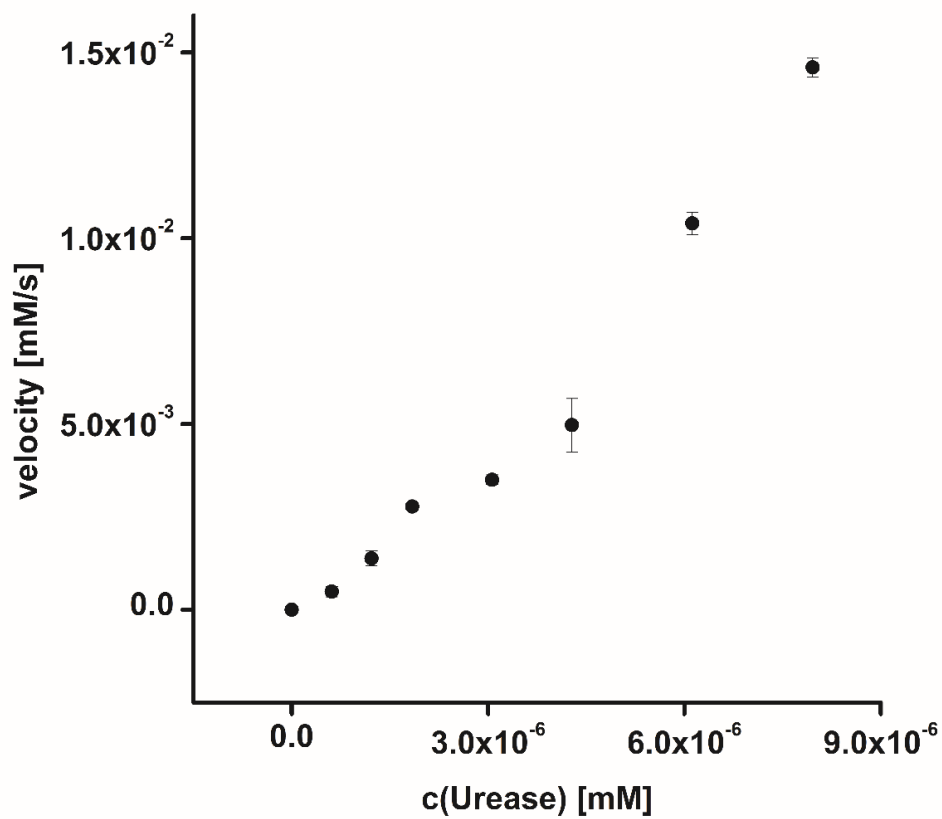

**Fig. S14.** Variation of the concentration of native urease show that increasing enzyme concentrations lead to higher urea degradation. Error bars are calculated from three repeats.

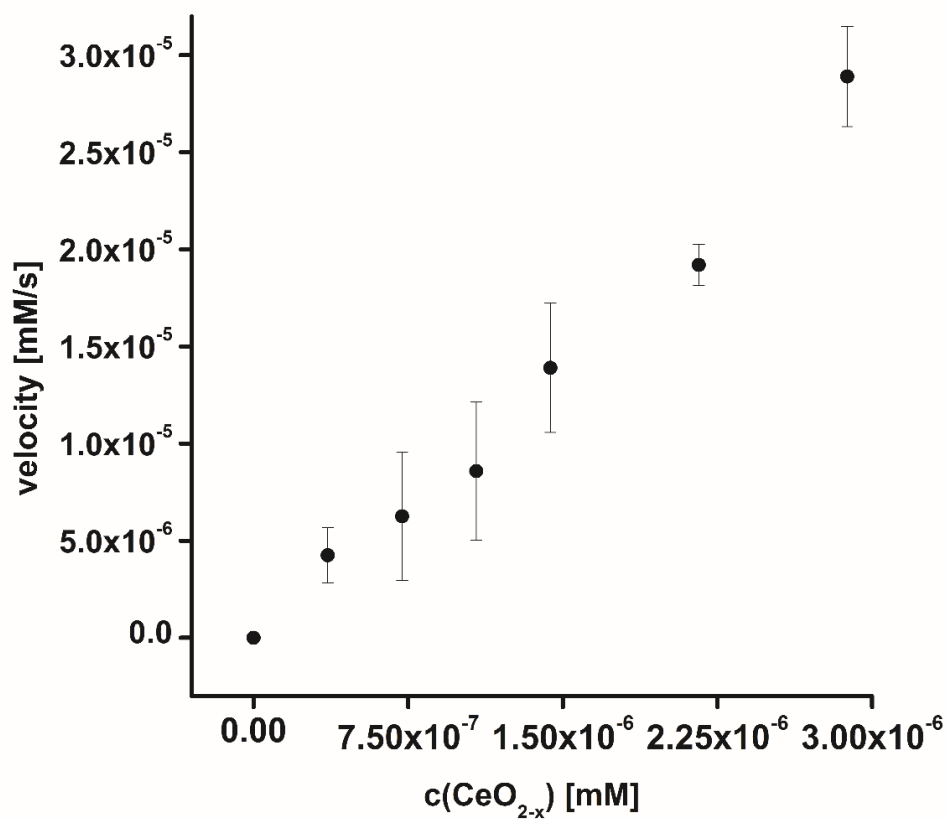

**Fig. S15. Variation of CeO<sub>2-x</sub> NR concentration** shows the dependency of catalyst concentration to substrate degradation. Increasing amounts of nanoparticles lead to an increase of urea decomposition. Error bars are calculated from three repeats.



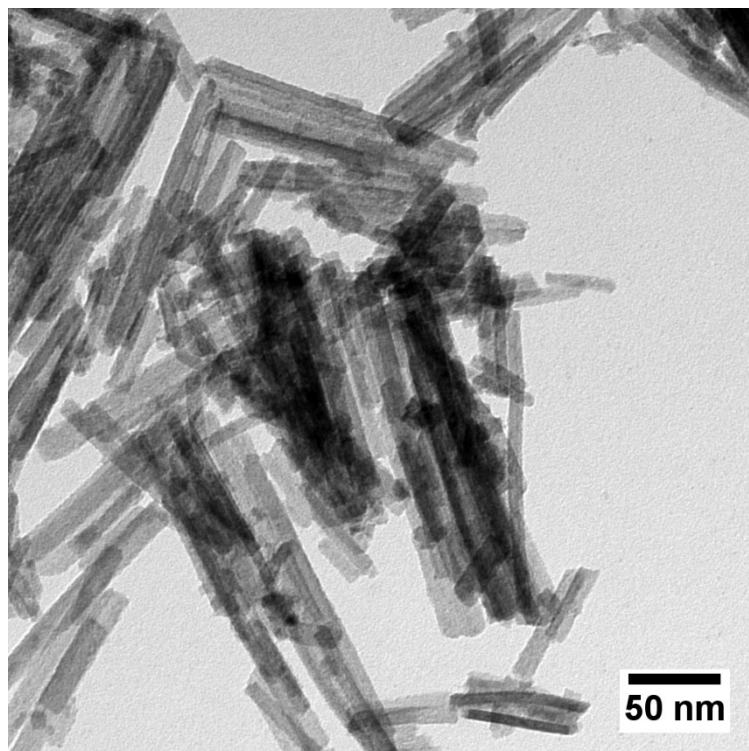

**Fig. S16.** TEM image of Ce<sub>0.6</sub>La<sub>0.4</sub>O<sub>1.80-x</sub> NRs.

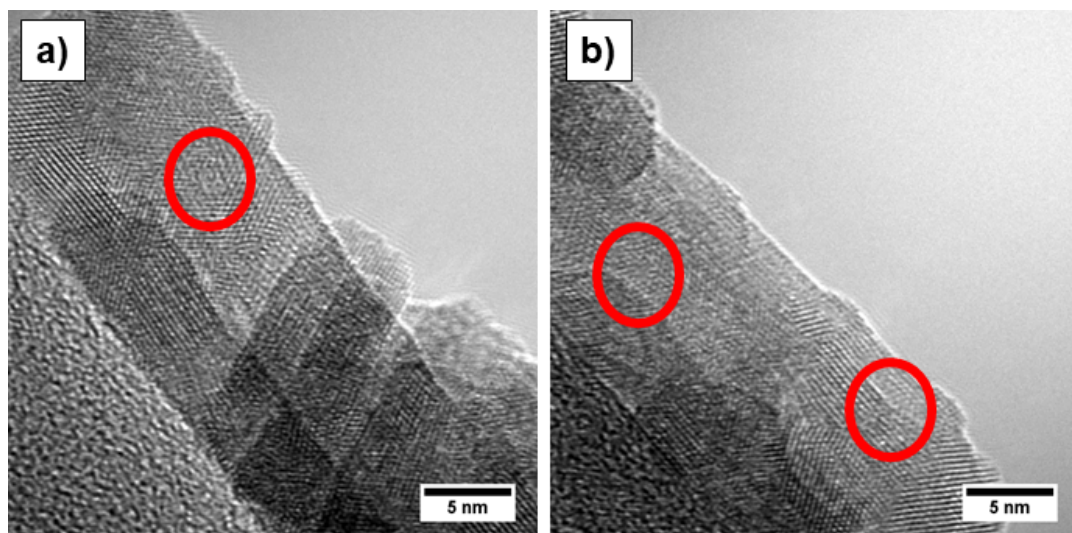

**Fig. S17. HR-TEM images of  $\text{Ce}_{0.6}\text{La}_{0.4}\text{O}_{1.80-x}$  NRs.** The images show the presence of surface defects, similar to the NR sample with a composition of  $\text{Ce}_{0.9}\text{La}_{0.1}\text{O}_{1.95-x}$ . The d spacings of 0.3 nm correspond to the (111) plane of  $\text{CeO}_2$ .

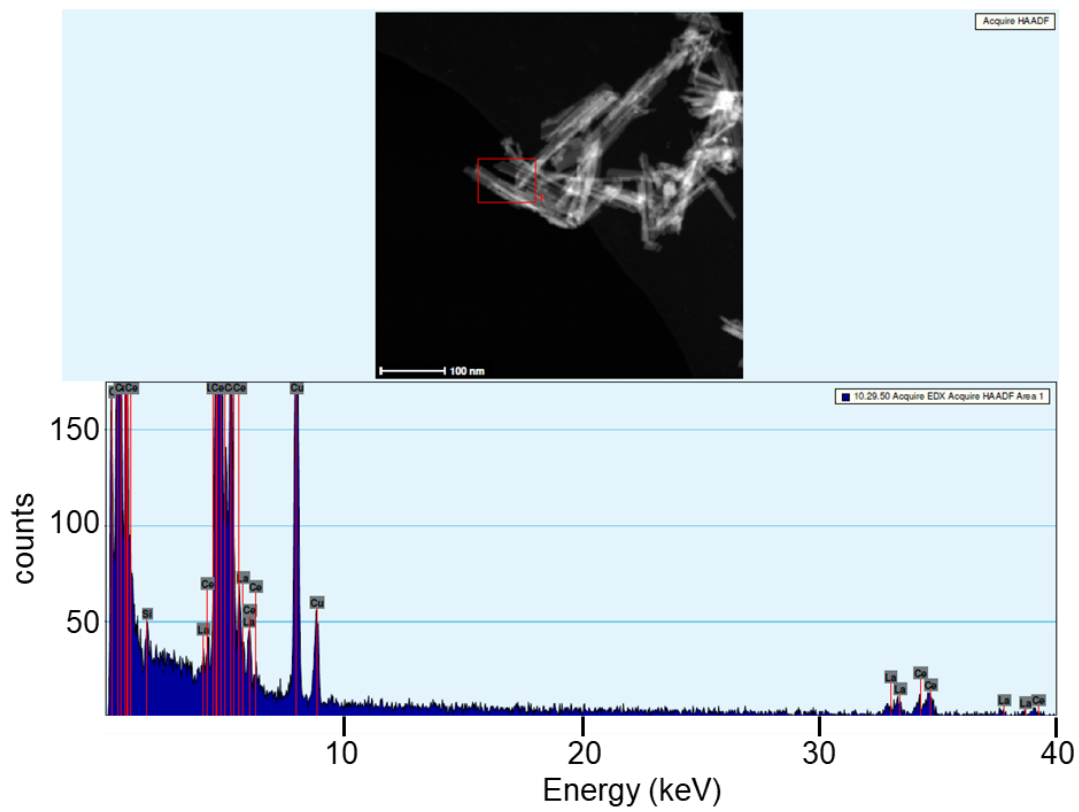

**Fig. S18. EDX spectrum of  $\text{Ce}_{0.6}\text{La}_{0.4}\text{O}_{1.80-x}$  NRs.** The spectrum shows the presence of La and Ce in the sample, and no further metal impurities.

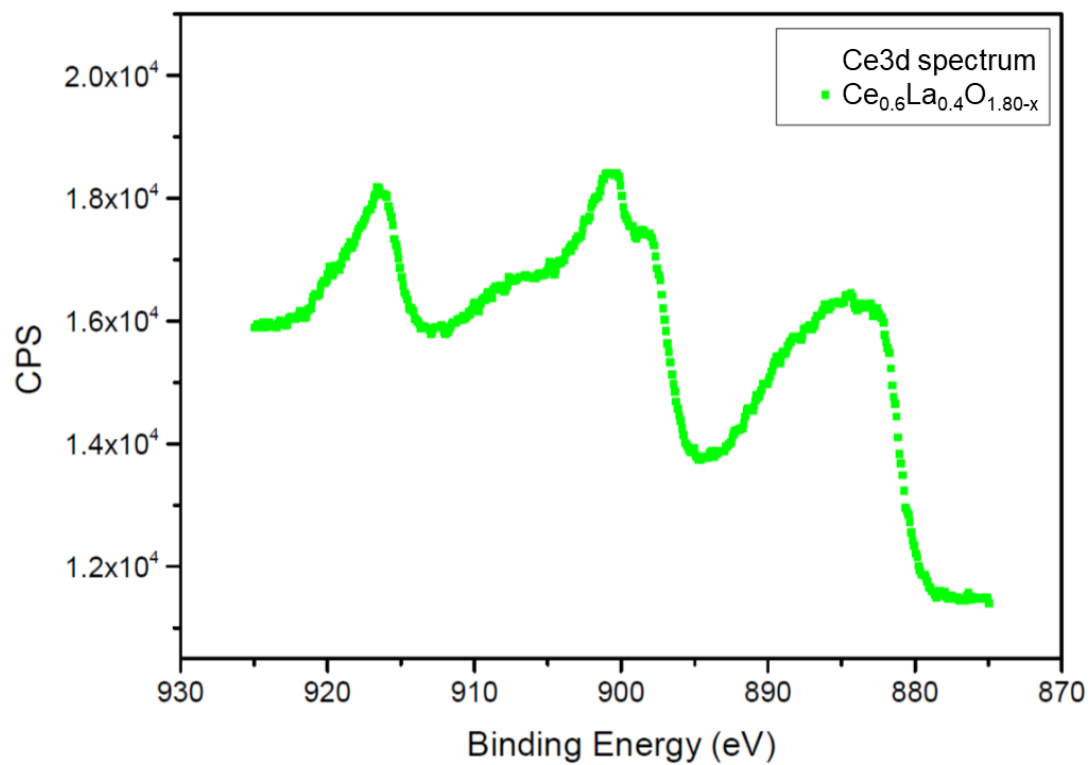

**Fig. S19. XPS spectrum of Ce<sub>0.6</sub>La<sub>0.4</sub>O<sub>1.80-x</sub> NRs.** The spectrum shows a higher amount of Ce<sup>3+</sup> compared to the un-doped CeO<sub>2-x</sub> and to the Ce<sub>0.9</sub>La<sub>0.1</sub>O<sub>1.95-x</sub> CeO<sub>2-x</sub> nanorods. A Ce<sup>3+</sup>/(Ce<sup>3+</sup>+Ce<sup>4+</sup>) ratio of 26.9 was extracted from the spectra.

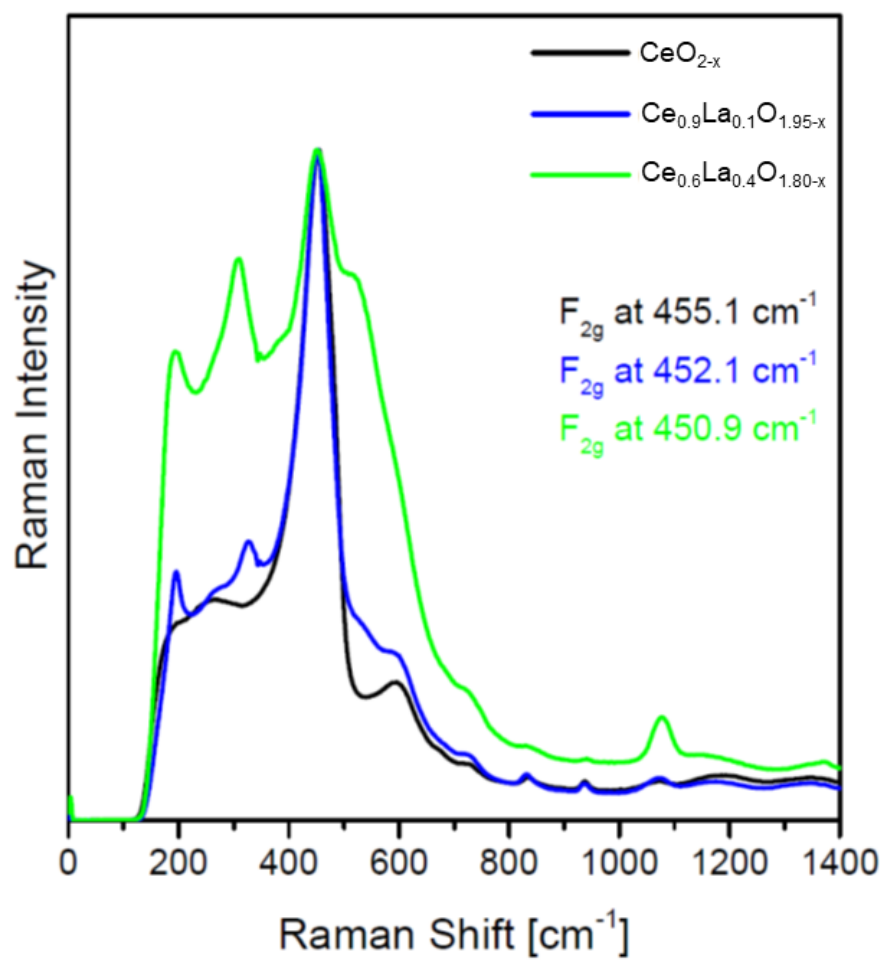

**Fig. S20.** Raman spectra of  $\text{CeO}_{2-x}$ ,  $\text{Ce}_{0.9}\text{La}_{0.1}\text{O}_{1.95-x}$  and  $\text{Ce}_{0.6}\text{La}_{0.4}\text{O}_{1.80-x}$  NRs.

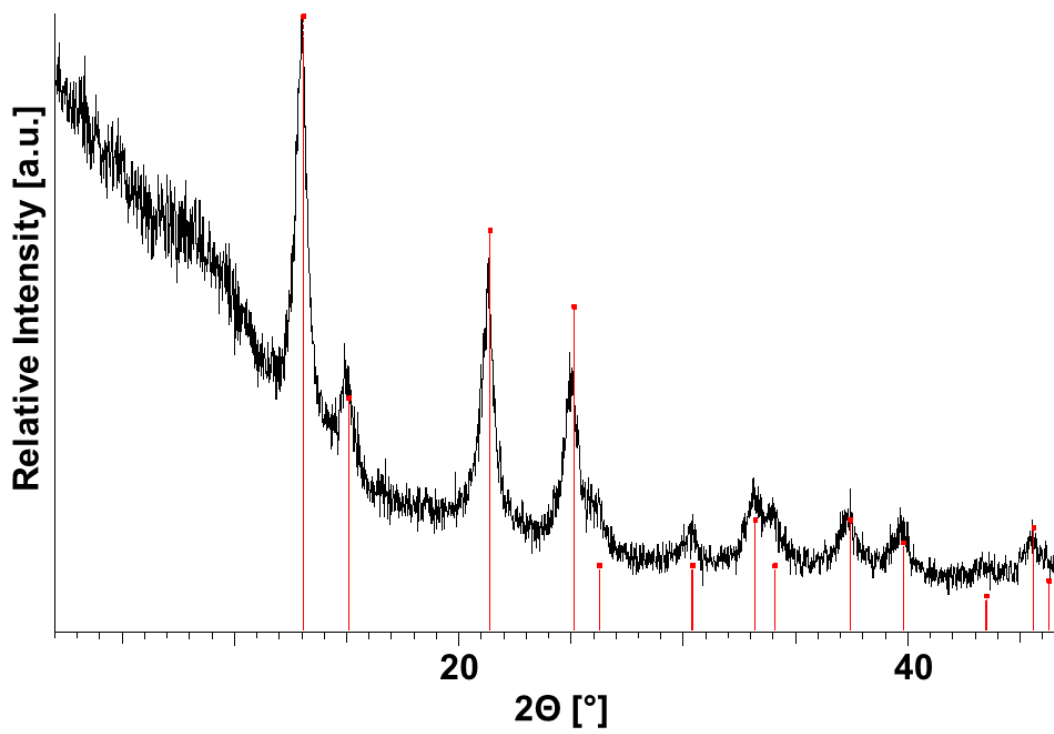

**Fig. S21. P-XRD measurement of  $\text{Ce}_{0.6}\text{La}_{0.4}\text{O}_{1.80-x}$  NRs.** The reflection positions of the measured pattern (black) are shifted to higher angles compared to the control pattern of cerianite (red). The results are in harmony with the diffractogram measured for  $\text{Ce}_{0.9}\text{La}_{0.1}\text{O}_{1.95-x}$ , where a detailed Rietveld refinement was carried out.

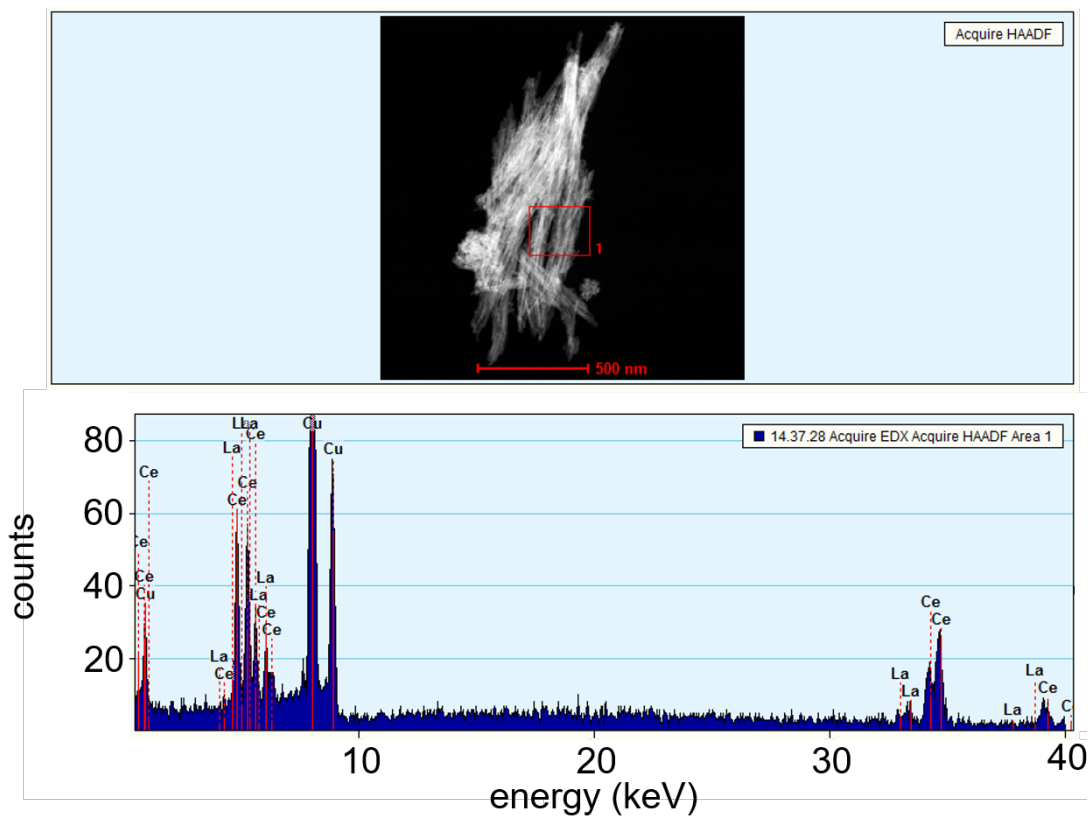

**Fig. S22.** EDX measurement of  $\text{Ce}_{0.9}\text{La}_{0.1}\text{O}_{1.95-x}$  NRs. The analysis revealed the presence of La in the sample. The results are in harmony with the results of the XPS and ICP-MS analysis.

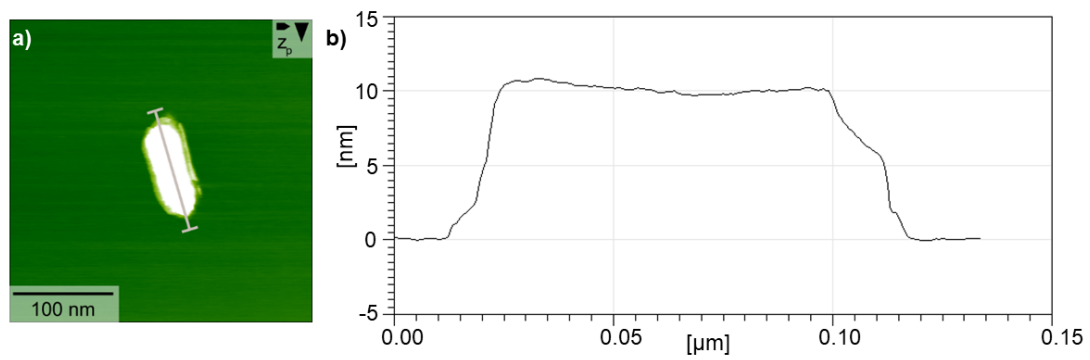

**Fig. S23.** AFM image of  $\text{Ce}_{0.9}\text{La}_{0.1}\text{O}_{1.95-x}$  NRs show a height of approx. 9-11 nm.



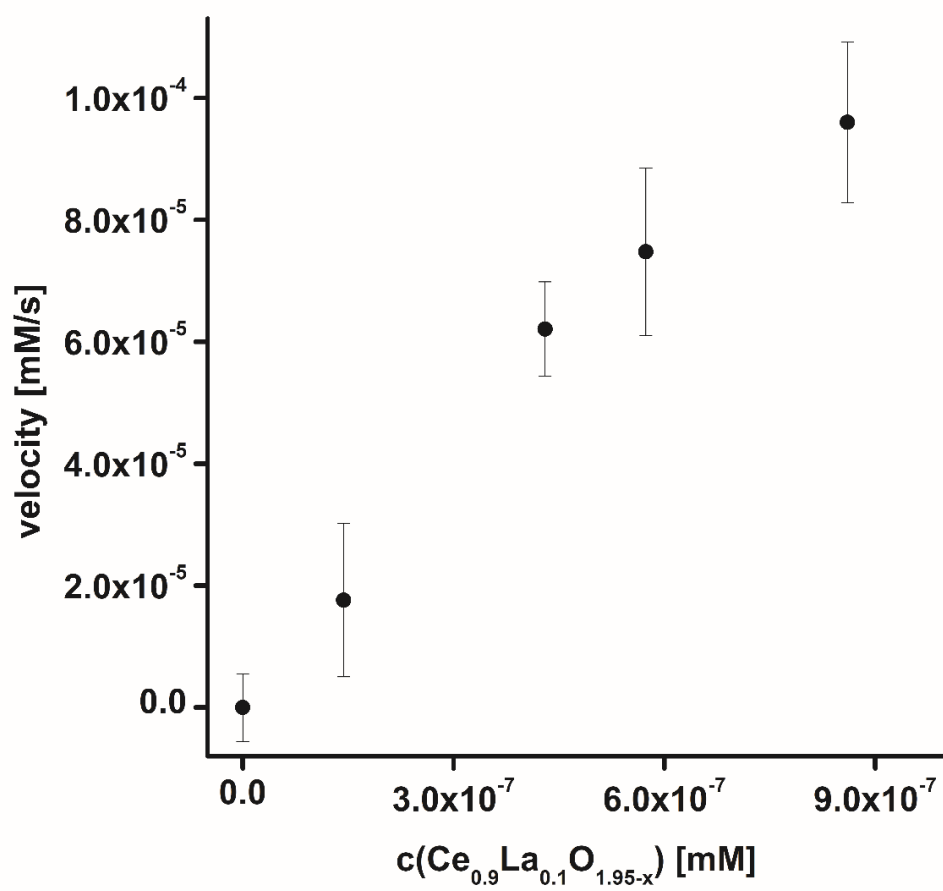

**Fig. S24.** Variation of the  $\text{Ce}_{0.9}\text{La}_{0.1}\text{O}_{1.95-x}$  NR concentration shows an increase of urea degradation with increasing particle concentration.

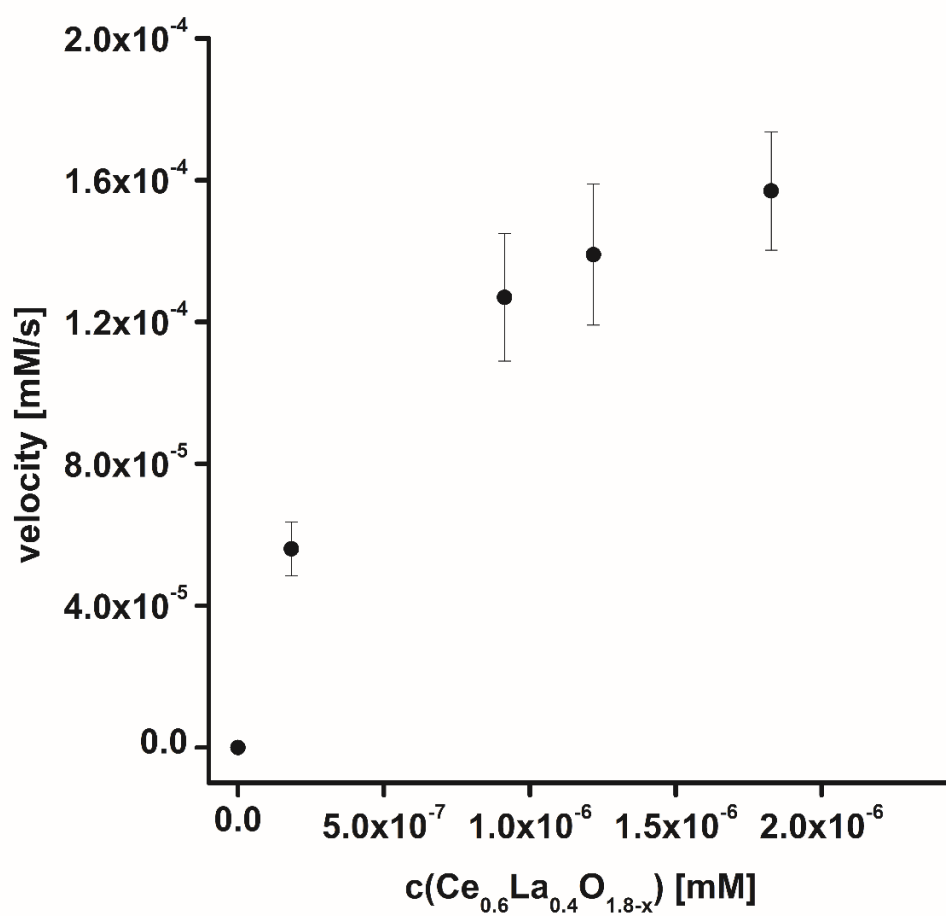

**Fig. S25.** Variation of the  $\text{Ce}_{0.6}\text{La}_{0.4}\text{O}_{1.8-x}$  NR concentration shows an increase of urea degradation with increasing particle concentration.

## Tables

**Tab. S1.** Data obtained from Rietveld refinements.

|                                  | CeO <sub>2-x</sub>                                                                                                                                      | Ce <sub>0.9</sub> La <sub>0.1</sub> O <sub>1.95-x</sub> |
|----------------------------------|---------------------------------------------------------------------------------------------------------------------------------------------------------|---------------------------------------------------------|
| Device                           | STOE Stadi P, Mo K $\alpha$ 1, Mythen 1K, transmission geometry                                                                                         |                                                         |
| Sample Prep                      | Powder between two vinyl acetate foils (15 $\mu$ m)                                                                                                     |                                                         |
| Measurement conditions           | 1.5 < 2 $\Theta$ / $^{\circ}$ < 70.83, resolution $\Delta\Theta$ = 0.015 $^{\circ}$<br>step scan, step size 1 $^{\circ}$ , step time $\Delta t$ = 180 s |                                                         |
| Background                       | Adapted                                                                                                                                                 |                                                         |
| $r_{wp}$                         | 4.95                                                                                                                                                    | 5.82                                                    |
| Gof                              | 2.09                                                                                                                                                    | 1.86                                                    |
| Space group                      | <i>Fm-3m</i>                                                                                                                                            |                                                         |
| Lattice Parameter / $\text{\AA}$ | a = 5.4071(6)                                                                                                                                           | a = 5.9685(2)                                           |
| Crystallite size / nm            | 6.8(3)                                                                                                                                                  | 5.9(8)                                                  |

**Tab. S2.** Surface composition from XPS analysis.

| Compound                                          | C<br>at% | O<br>at% | Ce<br>at% | La<br>at% | O/(Ce + La) |
|---------------------------------------------------|----------|----------|-----------|-----------|-------------|
| $\text{CeO}_{2-x}$                                | 9.9      | 57.0     | 33.1      | -         | 1.72        |
| $\text{Ce}_{0.9}\text{La}_{0.1}\text{O}_{1.95-x}$ | 8.5      | 55.9     | 30.7      | 4.9       | 1.57        |
| $\text{Ce}_{0.6}\text{La}_{0.4}\text{O}_{1.80-x}$ | 9.6      | 55.7     | 17.4      | 17.3      | 1.60        |

**Tab. S3.** Leaching of Ce of CeO<sub>2-x</sub>NRs in MilliQ water. Data are corrected against standard, but not blank corrected due to low blank values.

| sample                 | c(Ce) [ $\mu\text{g L}^{-1}$ ] | SD [ $\mu\text{g L}^{-1}$ ] |
|------------------------|--------------------------------|-----------------------------|
| blank (1)              | 0.04                           | 0.005                       |
| blank (2)              | 0.03                           | 0.003                       |
| blank (3)              | 0.05                           | 0.004                       |
| CeO <sub>2-x</sub> (1) | 0.4                            | 0.1                         |
| CeO <sub>2-x</sub> (3) | 1.6                            | 0.1                         |
| CeO <sub>2-x</sub> (2) | 0.8                            | 0.1                         |

**Tab. S4.** Leaching of Ce and La of  $\text{Ce}_{0.9}\text{La}_{0.1}\text{O}_{1.95-x}$  NRs in MilliQ water. Data corrected against standard, but not blank corrected, due to low blank values.

| sample                                                | c(Ce)<br>[ $\mu\text{g L}^{-1}$ ] | SD<br>[ $\mu\text{g L}^{-1}$ ] | c(La)<br>[ $\mu\text{g L}^{-1}$ ] | SD<br>[ $\mu\text{g L}^{-1}$ ] |
|-------------------------------------------------------|-----------------------------------|--------------------------------|-----------------------------------|--------------------------------|
| blank (1)                                             | 0.2                               | 0.01                           | 0.02                              | 0.003                          |
| blank (2)                                             | 0.1                               | 0.01                           | 0.01                              | 0.002                          |
| blank (3)                                             | 0.1                               | 0.01                           | 0.01                              | 0.002                          |
| $\text{Ce}_{0.9}\text{La}_{0.1}\text{O}_{1.95-x}$ (1) | 4.8                               | 0.2                            | 5.4                               | 0.2                            |
| $\text{Ce}_{0.9}\text{La}_{0.1}\text{O}_{1.95-x}$ (2) | 3.1                               | 0.2                            | 6.3                               | 0.3                            |
| $\text{Ce}_{0.9}\text{La}_{0.1}\text{O}_{1.95-x}$ (3) | 5.0                               | 0.2                            | 5.9                               | 0.2                            |

**Tab. S5.** Leaching of Ce of CeO<sub>2-x</sub> NRs in 2.94 M urea solution. Data corrected against standard, but not blank corrected due to low blank values.

| sample                 | c(Ce)<br>[ $\mu\text{g L}^{-1}$ ] | SD<br>[ $\mu\text{g L}^{-1}$ ] |
|------------------------|-----------------------------------|--------------------------------|
| blank (1)              | 0.5                               | 0.02                           |
| blank (2)              | 0.6                               | 0.03                           |
| blank (3)              | 0.4                               | 0.02                           |
| CeO <sub>2-x</sub> (1) | 12.3                              | 0.7                            |
| CeO <sub>2-x</sub> (2) | 8.1                               | 0.3                            |
| CeO <sub>2-x</sub> (3) | 5.9                               | 0.3                            |

**Tab. S6.** Leaching of Ce and La of  $\text{Ce}_{0.9}\text{La}_{0.1}\text{O}_{1.95-x}$  NRs in 2.94 M urea solution. Data corrected against standard, but not blank corrected due to low blank values.

| sample                                                | c(Ce)<br>[ $\mu\text{g L}^{-1}$ ] | SD<br>[ $\mu\text{g L}^{-1}$ ] | c(La)<br>[ $\mu\text{g L}^{-1}$ ] | SD<br>[ $\mu\text{g L}^{-1}$ ] |
|-------------------------------------------------------|-----------------------------------|--------------------------------|-----------------------------------|--------------------------------|
| blank (1)                                             | 0.5                               | 0.02                           | 0.01                              | 0.001                          |
| blank (2)                                             | 0.6                               | 0.03                           | 0.03                              | 0.003                          |
| blank (3)                                             | 0.4                               | 0.02                           | 0.01                              | 0.000                          |
| $\text{Ce}_{0.9}\text{La}_{0.1}\text{O}_{1.95-x}$ (1) | 6.2                               | 0.2                            | 9.4                               | 0.2                            |
| $\text{Ce}_{0.9}\text{La}_{0.1}\text{O}_{1.95-x}$ (2) | 3.3                               | 0.2                            | 5.2                               | 0.1                            |
| $\text{Ce}_{0.9}\text{La}_{0.1}\text{O}_{1.95-x}$ (3) | 6.7                               | 0.4                            | 5.5                               | 0.2                            |
